# Supplementary material for: Structural modification of hydroxyborates by adjusting the number of shared oxygen atoms and hydroxyl groups for further performance enhancement
Source: Royal Society of Chemistry journal article supplement (doi:10.1039/d4dt03136a), 2024-12-13
Supplement: d4dt03136a1.pdf [file d4dt03136a1.pdf]

## Supporting Information

### **Structural modification of hydroxyborates by adjusting the number of shared oxygen atoms and hydroxyl groups for further performance enhancement**

Xiaoqin Ma<sup>a</sup>, Xinjun Zhao<sup>\*a</sup>, Qianzhen Zhang<sup>b,c</sup>, Xifa Long<sup>b,c</sup>, Yun Yang<sup>\*b,c</sup>

*[a] Xinjiang Laboratory of Phase Transitions and Microstructures in Condensed Matter Physics, College of Physical Science and Technology, Yili Normal University, Yining, Xinjiang, 835000, China.*

*[b] Research Center for Crystal Materials, State Key Laboratory of Functional Materials and Devices for Special Environmental Conditions; Xinjiang Key Laboratory of Functional Crystal Materials; Xinjiang Technical Institute of Physics & Chemistry, Chinese Academy of Sciences, Urumqi 830011, China.*

*[c] Center of Materials Science and Optoelectronics Engineering, University of Chinese Academy of Sciences, Beijing 100049, China*

*\*Corresponding authors: Xinjun Zhao; Yun Yang  
E-mails: zhaoxinjunzsj@163.com; yangyun@ms.xjb.ac.cn*

**Table S1.** Crystal data and structure refinements for  $K_2B_5O_8(OH)$ ,  $CsB_5O_6(OH)_4$  and  $CsB_5O_7(OH)_2$ .

| Empirical formula                                          | $K_2B_5O_8(OH)$                                             | $CsB_5O_6(OH)_4$                                            | $CsB_5O_7(OH)_2$                                             |
|------------------------------------------------------------|-------------------------------------------------------------|-------------------------------------------------------------|--------------------------------------------------------------|
| Formula weight                                             | 277.26                                                      | 350.99                                                      | 332.98                                                       |
| Temperature                                                | 301K                                                        | 301K                                                        | 301K                                                         |
| Crystal system, Space group                                | Orthorhombic, $Pca2_1$                                      | Monoclinic, $P2_1/c$                                        | Monoclinic, $P2_1/c$                                         |
| <i>a</i> (Å)                                               | 8.5523(8)                                                   | 10.1898(19)                                                 | 9.0270(13)                                                   |
| <i>b</i> (Å)                                               | 7.3326(7)                                                   | 7.6098(17)                                                  | 7.7023(13)                                                   |
| <i>c</i> (Å)                                               | 12.9739(10)                                                 | 13.3055(3)                                                  | 12.0291(18)                                                  |
| $\beta$ (°)                                                | 90                                                          | 114.787(6)                                                  | 110.149(4)                                                   |
| Volume (Å <sup>3</sup> )                                   | 813.60(13)                                                  | 936.7(3)                                                    | 785.2(2)                                                     |
| <i>Z</i>                                                   | 4                                                           | 4                                                           | 4                                                            |
| Calculated density (Mg·m <sup>-3</sup> )                   | 2.264                                                       | 2.489                                                       | 2.817                                                        |
| Absorption coefficient (mm <sup>-1</sup> )                 | 1.193                                                       | 3.989                                                       | 4.741                                                        |
| <i>F</i> (000)                                             | 544                                                         | 656                                                         | 616                                                          |
| Crystal size (mm <sup>3</sup> )                            | 0.12 × 0.09 × 0.08                                          | 0.14 × 0.09 × 0.04                                          | 0.15 × 0.09 × 0.07                                           |
| Theta range for data collection (°)                        | 2.778 to 27.506                                             | 2.201 to 27.601                                             | 2.458 to 27.476                                              |
| Limiting indices                                           | -11 ≤ <i>h</i> ≤ 10, -9 ≤ <i>k</i> ≤ 9, -16 ≤ <i>l</i> ≤ 16 | -13 ≤ <i>h</i> ≤ 11, -9 ≤ <i>k</i> ≤ 9, -16 ≤ <i>l</i> ≤ 16 | -11 ≤ <i>h</i> ≤ 11, -10 ≤ <i>k</i> ≤ 9, -15 ≤ <i>l</i> ≤ 15 |
| Reflections collected / unique                             | 6084/1868 [ $R_{int}$ = 0.0549]                             | 10264/2164 [ $R_{int}$ = 0.0971]                            | 4964/1762 [ $R_{int}$ = 0.0517]                              |
| Data / restraints / parameters                             | 1868/1/145                                                  | 2164/4/161                                                  | 1762/1/144                                                   |
| Goodness-of-fit on $F^2$                                   | 1.055                                                       | 1.050                                                       | 1.075                                                        |
| Final <i>R</i> indices [ $I > 2\sigma(I)$ ] <sup>[a]</sup> | $R_1 = 0.0334$ , $wR_2 = 0.0693$                            | $R_1 = 0.0460$ , $wR_2 = 0.0847$                            | $R_1 = 0.0490$ , $wR_2 = 0.0965$                             |
| <i>R</i> indices (all data) <sup>[a]</sup>                 | $R_1 = 0.0389$ , $wR_2 = 0.0735$                            | $R_1 = 0.0835$ , $wR_2 = 0.1013$                            | $R_1 = 0.0688$ , $wR_2 = 0.1076$                             |
| Largest diff. peak and hole (e·Å <sup>-3</sup> )           | 0.350 and -0.420                                            | 0.849 and -1.206                                            | 1.040 and -1.730                                             |
| Flack parameter                                            | 0.05(4)                                                     |                                                             |                                                              |

<sup>[a]</sup> $R_1 = \frac{\sum ||F_o| - |F_c||}{\sum |F_o|}$  and  $wR_2 = [\frac{\sum w(F_o^2 - F_c^2)^2}{\sum wF_o^4}]^{1/2}$  for  $F_o^2 > 2\sigma(F_o^2)$

**Table S2.** Bond valence sums (BVSs) of fluorine atoms and oxygen atoms in three compounds.

| Compounds        | Atoms | BVS  | Atoms | BVS  |
|------------------|-------|------|-------|------|
| $K_2B_5O_8(OH)$  | F (9) | 0.79 | O (9) | 2.11 |
| $CsB_5O_6(OH)_4$ | F (1) | 0.80 | O (1) | 1.95 |
|                  | F (4) | 0.78 | O (4) | 1.97 |
|                  | F (6) | 0.78 | O (6) | 2.08 |
|                  | F (9) | 0.81 | O (9) | 2.12 |
| $CsB_5O_7(OH)_2$ | F (1) | 0.79 | O (1) | 1.87 |
|                  | F (9) | 0.79 | O (9) | 1.89 |

**Table S3.** Atomic coordinates ( $\times 10^4$ ), equivalent isotropic displacement parameters ( $\text{\AA}^2 \times 10^3$ ) and BVS for  $\text{K}_2\text{B}_5\text{O}_8(\text{OH})$ .  $U_{\text{eq}}$  is defined as one-third of the trace of the orthogonalized  $U_{ij}$  tensor.

| Atom        | x       | y        | z       | $U(\text{eq})$ | BVS  |
|-------------|---------|----------|---------|----------------|------|
| <b>K(1)</b> | 6453(1) | 10668(2) | 3866(1) | 29(1)          | 1.07 |
| <b>K(2)</b> | 8114(1) | 3684(1)  | 6188(1) | 27(1)          | 1.05 |
| <b>B(1)</b> | 5754(6) | 10003(7) | 6318(4) | 13(1)          | 3.03 |
| <b>B(2)</b> | 6397(5) | 7508(6)  | 7543(4) | 13(1)          | 3.01 |
| <b>B(3)</b> | 8167(5) | 8350(6)  | 6077(4) | 12(1)          | 3.12 |
| <b>B(4)</b> | 8075(5) | 6644(7)  | 4351(4) | 13(1)          | 3.04 |
| <b>B(5)</b> | 9003(6) | 4389(7)  | 3205(4) | 16(1)          | 3.04 |
| <b>O(1)</b> | 4816(3) | 11305(4) | 5893(2) | 13(1)          | 1.95 |
| <b>O(2)</b> | 7254(3) | 10023(4) | 5937(2) | 15(1)          | 2.09 |
| <b>O(3)</b> | 5287(4) | 8773(4)  | 7044(2) | 14(1)          | 2.08 |
| <b>O(4)</b> | 7935(3) | 7607(4)  | 7107(2) | 15(1)          | 1.76 |
| <b>O(5)</b> | 7631(4) | 6957(4)  | 5332(2) | 16(1)          | 2.04 |
| <b>O(6)</b> | 8504(3) | 7953(4)  | 3668(2) | 14(1)          | 2.18 |
| <b>O(7)</b> | 8113(4) | 4809(4)  | 4064(2) | 20(1)          | 2.07 |
| <b>O(8)</b> | 9297(4) | 5631(4)  | 2463(2) | 17(1)          | 2.02 |
| <b>O(9)</b> | 9503(4) | 2624(5)  | 3154(3) | 26(1)          | 2.11 |

BVS are calculated by using the bond-valence model ( $S_i = \exp [(R_o - R_i) / b]$ , where  $R_o$  is an empirical constant with values 2.132 for K-O bonds and 1.371 for B-O bonds,  $R_i$  is the length of bond  $i$  (in angstroms), and  $b = 0.37 \text{ \AA}$ ).

**Table S4.** Hydrogen bonds for  $\text{K}_2\text{B}_5\text{O}_8(\text{OH})$ .

| D-H...A            | $d(\text{D-H})/\text{\AA}$ | $d(\text{H-A})/\text{\AA}$ | $d(\text{D-A})/\text{\AA}$ | D-H-A/ $^\circ$ |
|--------------------|----------------------------|----------------------------|----------------------------|-----------------|
| O(9)-H(9)...O(1)#1 | 0.99                       | 2.21                       | 3.143(4)                   | 158             |
| O(9)-H(9)...O(3)#1 | 0.99                       | 2.71                       | 3.175(5)                   | 109             |
| O(9)-H(9)...O(4)#2 | 0.99                       | 2.26                       | 2.584(5)                   | 98              |

#1  $3/2-X, -1+Y, -1/2+Z$ ; #2  $2-X, 1-Y, -1/2+Z$

**Table S5.** Selected bond lengths (Å) and bond angles (°) for K<sub>2</sub>B<sub>5</sub>O<sub>8</sub>(OH).

|                           |                 |                    |                 |
|---------------------------|-----------------|--------------------|-----------------|
| <b>B(1)-O(1)</b>          | <b>1.363(5)</b> | <b>B(5)-O(7)</b>   | <b>1.384(6)</b> |
| <b>B(1)-O(2)</b>          | 1.376(6)        | B(5)-O(8)          | 1.349(6)        |
| <b>B(1)-O(3)</b>          | 1.363(6)        | B(5)-O(9)          | 1.365(6)        |
| <b>B(2)-O(3)</b>          | 1.477(6)        | K(1)-O(1)          | 3.015(3)        |
| <b>B(2)-O(4)</b>          | 1.434(5)        | K(1)-O(2)          | 2.812(3)        |
| <b>B(2)-O(6)#4</b>        | 1.498(6)        | K(1)-O(3)#7        | 2.824(3)        |
| <b>B(2)-O(8)#4</b>        | 1.503(5)        | K(1)-O(4)#6        | 3.244(3)        |
| <b>B(3)-O(1)#5</b>        | 1.453(5)        | K(1)-O(6)#8        | 2.730(3)        |
| <b>B(3)-O(2)</b>          | 1.465(5)        | K(1)-O(6)          | 2.665(3)        |
| <b>B(3)-O(4)</b>          | 1.457(6)        | K(1)-O(7)#1        | 3.362(3)        |
| <b>B(3)-O(5)</b>          | 1.480(5)        | K(1)-O(9)#1        | 3.117(4)        |
| <b>B(4)-O(5)</b>          | 1.347(6)        | K(1)-O(9)#2        | 3.076(4)        |
| <b>B(4)-O(6)</b>          | 1.357(6)        | K(2)-O(1)#9        | 3.339(3)        |
| <b>B(4)-O(7)</b>          | 1.397(6)        | K(2)-O(2)#9        | 2.802(3)        |
| <b>K(2)-O(3)#10</b>       | 2.817(3)        | K(2)-O(7)          | 2.876(3)        |
| <b>K(2)-O(4)</b>          | 3.117(3)        | K(2)-O(8)#4        | 3.005(3)        |
| <b>K(2)-O(5)</b>          | 2.676(3)        | K(2)-O(8)#11       | 2.809(3)        |
| <hr/>                     |                 |                    |                 |
| <b>O(1)-B(1)-O(2)</b>     | 113.3(4)        | O(1)-K(1)-O(9)#1   | 125.16(10)      |
| <b>O(3)-B(1)-O(1)</b>     | 124.8(4)        | O(2)-K(1)-O(1)     | 46.08(8)        |
| <b>O(3)-B(1)-O(2)</b>     | 121.9(4)        | O(2)-K(1)-O(3)#7   | 162.30(10)      |
| <b>O(3)-B(2)-O(6)#4</b>   | 109.1(3)        | O(2)-K(1)-O(4)#6   | 121.10(8)       |
| <b>O(3)-B(2)-O(8)#4</b>   | 106.9(3)        | O(2)-K(1)-O(7)#1   | 88.64(9)        |
| <b>O(4)-B(2)-O(3)</b>     | 112.6(4)        | O(2)-K(1)-O(9)#1   | 99.01(10)       |
| <b>O(4)-B(2)-O(6)#4</b>   | 108.8(4)        | O(2)-K(1)-O(9)#2   | 106.70(10)      |
| <b>O(4)-B(2)-O(8)#4</b>   | 112.4(3)        | O(3)#7-K(1)-O(1)   | 117.58(8)       |
| <b>O(6)#4-B(2)-O(8)#4</b> | 106.8(3)        | O(3)#7-K(1)-O(4)#6 | 66.19(8)        |
| <b>O(1)#5-B(3)-O(2)</b>   | 110.5(3)        | O(3)#7-K(1)-O(7)#1 | 98.92(9)        |
| <b>O(1)#5-B(3)-O(4)</b>   | 110.4(4)        | O(3)#7-K(1)-O(9)#1 | 97.23(10)       |
| <b>O(1)#5-B(3)-O(5)</b>   | 108.3(3)        | O(3)#7-K(1)-O(9)#2 | 64.95(10)       |
| <b>O(2)-B(3)-O(5)</b>     | 109.4(4)        | O(4)#6-K(1)-O(7)#1 | 127.63(8)       |
| <b>O(4)-B(3)-O(2)</b>     | 110.8(3)        | O(6)#8-K(1)-O(1)   | 66.15(8)        |
| <b>O(4)-B(3)-O(5)</b>     | 107.4(3)        | O(6)-K(1)-O(1)     | 120.36(9)       |
| <b>O(5)-B(4)-O(6)</b>     | 124.9(4)        | O(6)#8-K(1)-O(2)   | 112.18(9)       |

|                            |            |                             |            |
|----------------------------|------------|-----------------------------|------------|
| <b>O(5)-B(4)-O(7)</b>      | 115.0(4)   | <b>O(6)-K(1)-O(2)</b>       | 78.83(9)   |
| <b>O(6)-B(4)-O(7)</b>      | 120.0(4)   | <b>O(6)#8-K(1)-O(3)#7</b>   | 51.70(8)   |
| <b>O(8)-B(5)-O(7)</b>      | 121.8(4)   | <b>O(6)-K(1)-O(3)#7</b>     | 111.99(9)  |
| <b>O(8)-B(5)-O(9)</b>      | 123.2(4)   | <b>O(6)#8-K(1)-O(4)#6</b>   | 109.82(9)  |
| <b>O(9)-B(5)-O(7)</b>      | 115.0(4)   | <b>O(6)-K(1)-O(4)#6</b>     | 46.30(8)   |
| <b>O(1)-K(1)-O(4)#6</b>    | 142.72(9)  | <b>O(6)-K(1)-O(6)#8</b>     | 151.12(9)  |
| <b>O(1)-K(1)-O(7)#1</b>    | 89.41(8)   | <b>O(6)-K(1)-O(7)#1</b>     | 113.83(10) |
| <b>O(1)-K(1)-O(9)#2</b>    | 97.57(9)   | <b>O(6)#8-K(1)-O(7)#1</b>   | 93.59(9)   |
| <b>O(6)-K(1)-O(9)#2</b>    | 75.04(10)  | <b>O(2)#9-K(2)-O(8)#4</b>   | 109.81(9)  |
| <b>O(6)#8-K(1)-O(9)#1</b>  | 125.09(10) | <b>O(2)#9-K(2)-O(8)#11</b>  | 116.52(9)  |
| <b>O(6)-K(1)-O(9)#1</b>    | 76.37(9)   | <b>O(3)#10-K(2)-O(1)#9</b>  | 105.57(8)  |
| <b>O(6)#8-K(1)-O(9)#2</b>  | 76.19(10)  | <b>O(3)#10-K(2)-O(4)</b>    | 118.14(9)  |
| <b>O(9)#1-K(1)-O(4)#6</b>  | 88.55(9)   | <b>O(3)#10-K(2)-O(7)</b>    | 124.17(10) |
| <b>O(9)#2-K(1)-O(4)#6</b>  | 48.17(8)   | <b>O(3)#10-K(2)-O(8)#4</b>  | 122.65(9)  |
| <b>O(9)#2-K(1)-O(7)#1</b>  | 163.86(10) | <b>O(4)-K(2)-O(1)#9</b>     | 118.97(8)  |
| <b>O(9)#1-K(1)-O(7)#1</b>  | 41.72(8)   | <b>O(5)-K(2)-O(1)#9</b>     | 106.89(9)  |
| <b>O(9)#2-K(1)-O(9)#1</b>  | 136.53(12) | <b>O(5)-K(2)-O(2)#9</b>     | 140.37(10) |
| <b>O(2)#9-K(2)-O(1)#9</b>  | 42.64(8)   | <b>O(5)-K(2)-O(3)#10</b>    | 147.05(10) |
| <b>O(2)#9-K(2)-O(3)#10</b> | 66.81(9)   | <b>O(5)-K(2)-O(4)</b>       | 47.46(8)   |
| <b>O(2)#9-K(2)-O(4)</b>    | 156.25(9)  | <b>O(5)-K(2)-O(7)</b>       | 49.11(9)   |
| <b>O(2)#9-K(2)-O(7)</b>    | 99.39(10)  | <b>O(5)-K(2)-O(8)#11</b>    | 101.88(10) |
| <b>O(5)-K(2)-O(8)#4</b>    | 72.33(9)   | <b>O(8)#11-K(2)-O(3)#10</b> | 50.37(9)   |
| <b>O(7)-K(2)-O(1)#9</b>    | 92.27(9)   | <b>O(8)#11-K(2)-O(4)</b>    | 69.41(9)   |
| <b>O(7)-K(2)-O(4)</b>      | 95.86(9)   | <b>O(8)#4-K(2)-O(4)</b>     | 46.94(8)   |
| <b>O(7)-K(2)-O(8)#4</b>    | 113.01(9)  | <b>O(8)#11-K(2)-O(7)</b>    | 120.89(10) |
| <b>O(8)#11-K(2)-O(1)#9</b> | 145.77(9)  | <b>O(8)#11-K(2)-O(8)#4</b>  | 97.57(9)   |
| <b>O(8)#4-K(2)-O(1)#9</b>  | 74.42(8)   |                             |            |

Symmetry transformations used to generate equivalent atoms:

#1 x, y+1, z; #2 x-1/2, -y+1, z; #3 -x+1, -y+2, z+1/2; #4 -x+3/2, y, z+1/2;  
 #5 x+1/2, -y+2, z; #6 -x+3/2, y, z-1/2; #7 -x+1, -y+2, z-1/2; #8 x-1/2, -y+2, z;  
 #9 x, y-1, z; #10 x+1/2, -y+1, z; #11 -x+2, -y+1, z+1/2; #12 -x+2, -y+1, z-1/2

**Table S6.** Atomic coordinates ( $\times 10^4$ ), equivalent isotropic displacement parameters ( $\text{\AA}^2 \times 10^3$ ) and BVS for  $\text{CsB}_5\text{O}_6(\text{OH})_4$ .  $U_{\text{eq}}$  is defined as one-third of the trace of the orthogonalized  $U_{ij}$  tensor.

| Atoms        | x/a      | y/b      | z/c     | $U(\text{eq})$ | BVS  |
|--------------|----------|----------|---------|----------------|------|
| <b>Cs(1)</b> | 8197(1)  | 8384(1)  | 6897(1) | 34(1)          | 0.99 |
| <b>B(1)</b>  | -170(8)  | 5749(11) | 2830(7) | 25(2)          | 3.07 |
| <b>B(2)</b>  | -602(8)  | 8092(11) | 3884(6) | 20(2)          | 3.06 |
| <b>B(3)</b>  | 1833(8)  | 6935(10) | 4357(7) | 20(2)          | 3.09 |
| <b>B(4)</b>  | 4380(7)  | 7424(11) | 5032(7) | 21(2)          | 3.08 |
| <b>B(5)</b>  | 3417(8)  | 5589(10) | 6067(7) | 21(2)          | 3.05 |
| <b>O(1)</b>  | -1568(5) | 9078(7)  | 4117(4) | 27(1)          | 1.95 |
| <b>O(2)</b>  | -1119(4) | 6796(6)  | 3100(4) | 20(1)          | 1.93 |
| <b>O(3)</b>  | 806(4)   | 8315(7)  | 4388(4) | 24(1)          | 1.83 |
| <b>O(4)</b>  | -673(5)  | 4561(7)  | 1988(4) | 29(1)          | 1.97 |
| <b>O(5)</b>  | 2128(5)  | 5847(7)  | 5330(4) | 29(1)          | 1.92 |
| <b>O(6)</b>  | 3711(5)  | 4552(7)  | 6983(4) | 27(1)          | 2.08 |
| <b>O(7)</b>  | 3092(4)  | 7793(6)  | 4300(4) | 24(1)          | 2.03 |
| <b>O(8)</b>  | 4596(4)  | 6383(7)  | 5953(4) | 27(1)          | 1.96 |
| <b>O(9)</b>  | 5564(5)  | 8019(7)  | 4898(4) | 32(1)          | 2.12 |
| <b>O(10)</b> | 1214(4)  | 5884(6)  | 3353(4) | 24(1)          | 2.07 |

BVS are calculated by using the bond-valence model ( $S_i = \exp [(R_o - R_i / b)]$ , where  $R_o$  is an empirical constant with values 2.417 for Cs-O bonds and 1.371 for B-O bonds,  $R_i$  is the length of bond  $i$  (in angstroms), and  $b = 0.37 \text{ \AA}$ ).



**Table S7.** Selected bond lengths (Å) and bond angles (°) for CsB<sub>5</sub>O<sub>6</sub>(OH)<sub>4</sub>.

|                            |                  |                          |                  |
|----------------------------|------------------|--------------------------|------------------|
| <b>Cs(1)-O(3)#1</b>        | <b>3.362(5)</b>  | <b>B(2)-O(3)</b>         | <b>1.358(8)</b>  |
| Cs(1)-O(7)#2               | 3.273(5)         | B(2)-O(1)                | 1.354(9)         |
| Cs(1)-O(7)#1               | 3.337(5)         | B(3)-O(5)                | 1.445(9)         |
| Cs(1)-O(1)#3               | 3.723(5)         | B(3)O-(10)               | 1.463(9)         |
| Cs(1)-O(10)#2              | 3.264(5)         | B(3)-O(7)                | 1.464(9)         |
| Cs(1)-O(10)#4              | 3.339(5)         | B(3)-O(3)                | 1.492(9)         |
| Cs(1)-O(8)                 | 3.753(4)         | B(4)-O(8)                | 1.382(9)         |
| Cs(1)-O(8)#5               | 3.679(5)         | B(4)-O(7)                | 1.346(8)         |
| Cs(1)-O(6)#5               | 3.092(5)         | B(4)-O(9)                | 1.356(9)         |
| Cs(1)-O(4)#4               | 3.297(5)         | B(5)-O(5)                | 1.334(8)         |
| Cs(1)-O(9)                 | 3.002(5)         | B(5)-O(8)                | 1.398(9)         |
| B(1)-O(2)                  | 1.389(9)         | B(5)-O(6)                | 1.364(9)         |
| B(1)-O(10)                 | 1.333(9)         | B(1)-O(4)                | 1.367(10)        |
| B(2)-O(2)                  | 1.378(9)         |                          |                  |
| <hr/>                      |                  |                          |                  |
| <b>O(4)#4-Cs(1)-O(8)#5</b> | <b>85.69(11)</b> | <b>O(9)-Cs(1)-O(3)#1</b> | <b>88.77(12)</b> |
| O(3)#1-Cs(1)-O(1)#3        | 44.16(11)        | O(9)-Cs(1)-O(7)#1        | 66.31(13)        |
| O(3)#1-Cs(1)-O(8)          | 125.12(10)       | O(7)#2-Cs(1)-O(1)#3      | 172.10(11)       |
| O(3)#1-Cs(1)-O(8)#5        | 72.49(11)        | O(7)#2-Cs(1)-O(10)#4     | 83.87(12)        |
| O(7)#2-Cs(1)-O(3)#1        | 142.34(12)       | O(7)#1-Cs(1)-O(10)#4     | 149.06(12)       |
| O(7)#1-Cs(1)-O(3)#1        | 42.07(11)        | O(7)#2-Cs(1)-O(8)        | 80.68(11)        |
| O(7)#2-Cs(1)-O(7)#1        | 122.57(12)       | O(7)#1-Cs(1)-O(8)        | 91.46(11)        |
| O(7)#1-Cs(1)-O(1)#3        | 65.09(12)        | O(7)#2-Cs(1)-O(8)#5      | 70.75(11)        |
| O(1)#3-Cs(1)-O(8)          | 97.80(10)        | O(7)#1-Cs(1)-O(8)#5      | 80.99(11)        |
| O(10)#2-Cs(1)-O(3)#1       | 121.04(12)       | O(7)#2-Cs(1)-O(4)#4      | 71.19(12)        |
| O(10)#4-Cs(1)-O(3)#1       | 125.65(12)       | O(9)-Cs(1)-O(1)#3        | 61.79(12)        |
| O(10)#2-Cs(1)-O(7)#1       | 84.06(12)        | O(9)-Cs(1)-O(10)#2       | 88.01(13)        |
| O(10)#2-Cs(1)-O(7)#2       | 42.45(11)        | O(9)-Cs(1)-O(10)#4       | 87.87(13)        |
| O(10)#4-Cs(1)-O(1)#3       | 88.23(12)        | O(9)-Cs(1)-O(8)#5        | 145.69(13)       |
| O(10)#2-Cs(1)-O(1)#3       | 143.00(11)       | O(9)-Cs(1)-O(8)          | 38.03(12)        |
| O(10)#2-Cs(1)-O(10)#4      | 113.03(13)       | O(9)-Cs(1)-O(6)#5        | 151.49(14)       |
| O(10)#2-Cs(1)-O(8)#5       | 78.20(11)        | O(9)-Cs(1)-O(4)#4        | 128.55(14)       |
| O(10)#4-Cs(1)-O(8)         | 76.25(11)        | O(10)-B(1)-O(2)          | 122.3(7)         |
| O(10)#2-Cs(1)-O(8)         | 61.44(11)        | O(10)-B(1)-O(4)          | 118.8(7)         |

|                             |            |                   |            |
|-----------------------------|------------|-------------------|------------|
| <b>O(10)#4-Cs(1)-O(8)#5</b> | 126.42(11) | O(4)-B(1)-O(2)    | 118.9(6)   |
| <b>O(10)#2-Cs(1)-O(4)#4</b> | 113.46(12) | O(3)-B(2)-O(2)    | 120.2(6)   |
| <b>O(8)#5-Cs(1)-O(1)#3</b>  | 114.16(11) | O(1)-B(2)-O(2)    | 116.3(6)   |
| <b>O(8)#5-Cs(1)-O(8)</b>    | 139.53(6)  | O(1)-B(2)-O(3)    | 123.5(6)   |
| <b>O(6)#5-Cs(1)-O(3)#1</b>  | 65.17(12)  | O(7)-B(3)-O(3)    | 108.8(6)   |
| <b>O(6)#5-Cs(1)-O(7)#1</b>  | 97.68(12)  | O(10)-B(3)-O(3)   | 108.9(5)   |
| <b>O(6)#5-Cs(1)-O(7)#2</b>  | 90.38(12)  | O(10)-B(3)-O(7)   | 107.9(6)   |
| <b>O(6)#5-Cs(1)-O(1)#3</b>  | 90.36(12)  | O(5)-B(3)-O(3)    | 108.1(6)   |
| <b>O(6)#5-Cs(1)-O(10)#2</b> | 114.69(13) | O(5)-B(3)-O(7)    | 112.6(5)   |
| <b>O(6)#5-Cs(1)-O(10)#4</b> | 97.86(12)  | O(5)-B(3)-O(10)   | 110.4(6)   |
| <b>O(6)#5-Cs(1)-O(8)#5</b>  | 38.87(11)  | O(7)-B(4)-O(8)    | 122.7(6)   |
| <b>O(6)#5-Cs(1)-O(8)</b>    | 169.71(12) | O(7)-B(4)-O(9)    | 122.0(7)   |
| <b>O(6)#5-Cs(1)-O(4)#4</b>  | 59.84(13)  | O(9)-B(4)-O(8)    | 115.3(6)   |
| <b>O(4)#4-Cs(1)-O(3)#1</b>  | 113.92(12) | O(5)-B(5)-O(8)    | 121.7(7)   |
| <b>O(4)#4-Cs(1)-O(7)#1</b>  | 155.34(12) | O(5)-B(5)-O(6)    | 124.1(6)   |
| <b>O(4)#4-Cs(1)-O(1)#3</b>  | 102.49(12) | O(6)-B(5)-O(8)    | 114.3(6)   |
| <b>O(9)-Cs(1)-O(7)#2</b>    | 118.05(13) | O(4)#4-Cs(1)-O(8) | 111.91(12) |
| <b>O(4)#4-Cs(1)-O(10)#4</b> | 41.01(11)  |                   |            |

Symmetry transformations used to generate equivalent atoms:

#1  $-x+1, -y+2, -z+1$ ; #2  $x+1/2, -y+3/2, z+1/2$ ; #3  $x+1, y, z$ ; #4  $-x+1, -y+1, -z+1$ ;

#5  $-x+3/2, y+1/2, -z+3/2$ ; #6  $x-1/2, -y+3/2, z-1/2$ ; #7  $x-1, y, z$ ;

#8  $-x+3/2, y-1/2, -z+3/2$

**Table S8.** Hydrogen bonds for CsB<sub>5</sub>O<sub>6</sub>(OH)<sub>4</sub>.

| D-H...A             | <i>d</i> (D-H)/Å | <i>d</i> (H-A)/Å | <i>d</i> (D-A)/Å | D-H-A/Å |
|---------------------|------------------|------------------|------------------|---------|
| O(1)-H(1)...O(3)#9  | 0.94             | 1.76             | 2.684(7)         | 166     |
| O(9)-H(9)...O(4)#10 | 0.95             | 1.87             | 2.743(7)         | 153     |
| O(4)-H(4)...O(1)#11 | 0.95             | 1.75             | 2.686(6)         | 172     |
| O(6)-H(6)...O(2)#12 | 0.94             | 1.87             | 2.799(6)         | 170     |

#9 -x, -y+2, -z+1; #10 -x+1/2, y+1/2, -z+1/2; #11 -x-1/2, y-1/2, -z+1/2;

#12 -x, -y+1, -z+1

**Table S9.** Atomic coordinates ( $\times 10^4$ ), equivalent isotropic displacement parameters ( $\text{\AA}^2 \times 10^3$ ) and BVS for  $\text{CsB}_5\text{O}_7(\text{OH})_2$ .  $U_{\text{eq}}$  is defined as one-third of the trace of the orthogonalized  $U_{ij}$  tensor.

| Atoms        | x/a      | y/b      | z/c     | $U(\text{eq})$ | BVS  |
|--------------|----------|----------|---------|----------------|------|
| <b>Cs(1)</b> | 835(1)   | 1435(1)  | 7732(1) | 36(1)          | 1.03 |
| <b>B(1)</b>  | 6383(10) | 8951(11) | 4820(7) | 22(2)          | 3.02 |
| <b>B(2)</b>  | 4204(10) | 7000(11) | 4206(7) | 21(2)          | 3.09 |
| <b>B(3)</b>  | 1941(10) | 4963(11) | 4037(7) | 20(2)          | 3.06 |
| <b>B(4)</b>  | 158(10)  | 2924(12) | 4332(8) | 23(2)          | 3.06 |
| <b>B(5)</b>  | 17(10)   | 3544(12) | 2313(7) | 23(2)          | 3.04 |
| <b>O(1)</b>  | 7561(7)  | 9725(8)  | 5715(5) | 28(1)          | 1.87 |
| <b>O(2)</b>  | 6237(6)  | 9292(7)  | 3678(4) | 25(1)          | 1.87 |
| <b>O(3)</b>  | 5333(6)  | 7880(7)  | 5101(4) | 25(1)          | 1.95 |
| <b>O(4)</b>  | 4102(6)  | 7155(7)  | 3072(4) | 26(1)          | 1.79 |
| <b>O(5)</b>  | 3266(6)  | 5952(6)  | 4588(4) | 22(1)          | 2.01 |
| <b>O(6)</b>  | 1203(6)  | 4934(7)  | 2865(4) | 23(1)          | 1.81 |
| <b>O(7)</b>  | 1456(6)  | 3978(7)  | 4804(4) | 24(1)          | 1.97 |
| <b>O(8)</b>  | -622(6)  | 2794(7)  | 3153(5) | 26(1)          | 1.87 |
| <b>O(9)</b>  | -335(8)  | 2092(8)  | 5141(5) | 31(1)          | 1.89 |

BVS are calculated by using the bond-valence model ( $S_i = \exp [(R_o - R_i) / b]$ , where  $R_o$  is an empirical constant with values 2.417 for Cs-O bonds and 1.371 for B-O bonds,  $R_i$  is the length of bond  $i$  (in angstroms), and  $b = 0.37 \text{ \AA}$ ).

**Table S10.** Hydrogen bonds for CsB<sub>5</sub>O<sub>7</sub>(OH)<sub>2</sub>.

| D-H...A             | <i>d</i> (D-H)/Å | <i>d</i> (H-A)/Å | <i>d</i> (D-A)/Å | D-H-A/Å |
|---------------------|------------------|------------------|------------------|---------|
| O(9)-H(9)...O(1)#1  | 0.73             | 2.41             | 2.883            | 125     |
| O(1)-H(1)...O(6)#16 | 0.80             | 2.50             | 3.232            | 152     |

#1 *x*-1, *y*-1, *z*; #16 *x*+1/2, -*y*+3/2, *z*+1/2

**Table S11.** Selected bond lengths (Å) and bond angles (°) for CsB<sub>5</sub>O<sub>7</sub>(OH)<sub>2</sub>.

|                            |                   |                            |                   |
|----------------------------|-------------------|----------------------------|-------------------|
| <b>Cs(1)-O(1)#1</b>        | <b>3.378(5)</b>   | <b>B(2)-O(3)</b>           | <b>1.379(10)</b>  |
| Cs(1)-O(2)#2               | 3.641(5)          | B(1)-O(3)                  | 1.383(10)         |
| Cs(1)-O(2)#3               | 3.460(5)          | B(2)-O(4)                  | 1.340(9)          |
| Cs(1)-O(3)#4               | 3.322(5)          | B(5)#9-O(4)                | 1.498(9)          |
| Cs(1)-O(4)#5               | 3.271(6)          | B(2)-O(5)                  | 1.359(10)         |
| Cs(1)-O(5)#4               | 3.064(5)          | B(3)-O(5)                  | 1.380(10)         |
| Cs(1)-O(6)#6               | 3.288(5)          | B(5)-O(6)                  | 1.498(10)         |
| Cs(1)-O(7)#4               | 3.654(5)          | B(3)-O(6)                  | 1.337(9)          |
| Cs(1)-O(8)#7               | 3.118(5)          | B(3)-O(7)                  | 1.377(9)          |
| Cs(1)-O(8)#8               | 3.412(5)          | B(4)-O(7)                  | 1.377(10)         |
| Cs(1)-O(9)                 | 2.970(6)          | B(5)-O(8)                  | 1.445(10)         |
| <b>B(1)-O(1)</b>           | <b>1.363(10)</b>  | <b>B(4)-O(8)</b>           | <b>1.352(10)</b>  |
| <b>B(5)#9-O(2)</b>         | <b>1.451(10)</b>  | <b>B(4)-O(9)</b>           | <b>1.361(10)</b>  |
| <b>B(1)-O(2)</b>           | <b>1.360(9)</b>   |                            |                   |
| <hr/>                      |                   |                            |                   |
| <b>O(1)#1-Cs(1)-O(2)#3</b> | <b>125.01(13)</b> | <b>O(5)#4-Cs(1)-O(8)#8</b> | <b>100.27(13)</b> |
| O(1)#1-Cs(1)-O(2)#2        | 101.62(13)        | O(6)#6-Cs(1)-O(1)#1        | 83.66(13)         |
| O(1)#1-Cs(1)-O(7)#4        | 123.78(13)        | O(6)#6-Cs(1)-O(2)#3        | 41.43(12)         |
| O(1)#1-Cs(1)-O(8)#8        | 57.48(14)         | O(6)#6-Cs(1)-O(2)#2        | 118.06(12)        |
| O(2)#3-Cs(1)-O(2)#2        | 106.77(12)        | O(6)#6-Cs(1)-O(3)#4        | 65.26(12)         |
| O(2)#3-Cs(1)-O(7)#4        | 105.11(12)        | O(6)#6-Cs(1)-O(7)#4        | 141.75(11)        |
| O(2)#2-Cs(1)-O(7)#4        | 84.70(11)         | O(6)#6-Cs(1)-O(8)#8        | 140.98(13)        |
| O(3)#4-Cs(1)-O(1)#1        | 104.98(14)        | O(8)#7-Cs(1)-O(1)#1        | 141.77(14)        |
| O(3)#4-Cs(1)-O(2)#2        | 153.40(12)        | O(8)#7-Cs(1)-O(2)#3        | 77.28(13)         |
| O(3)#4-Cs(1)-O(2)#3        | 56.57(13)         | O(8)#8-Cs(1)-O(2)#2        | 71.33(12)         |
| O(3)#4-Cs(1)-O(7)#4        | 80.89(11)         | O(8)#8-Cs(1)-O(2)#3        | 177.37(12)        |
| O(3)#4-Cs(1)-O(8)#8        | 124.45(13)        | O(8)#7-Cs(1)-O(2)#2        | 40.23(13)         |
| O(4)#5-Cs(1)-O(1)#1        | 54.73(13)         | O(8)#7-Cs(1)-O(3)#4        | 113.18(13)        |
| O(4)#5-Cs(1)-O(2)#3        | 139.77(12)        | O(8)#7-Cs(1)-O(4)#5        | 130.43(14)        |
| O(4)#5-Cs(1)-O(2)#2        | 112.53(12)        | O(8)#7-Cs(1)-O(6)#6        | 109.81(13)        |
| O(4)#5-Cs(1)-O(3)#4        | 83.71(13)         | O(8)#8-Cs(1)-O(7)#4        | 73.06(12)         |
| O(4)#5-Cs(1)-O(6)#6        | 119.39(13)        | O(8)#7-Cs(1)-O(7)#4        | 66.70(13)         |
| O(4)#5-Cs(1)-O(7)#4        | 71.10(13)         | O(8)#7-Cs(1)-O(8)#8        | 100.19(12)        |
| O(4)#5-Cs(1)-O(8)#8        | 41.75(12)         | O(9)-Cs(1)-O(1)#1          | 53.56(16)         |

|                             |            |                          |            |
|-----------------------------|------------|--------------------------|------------|
| <b>O(5)#4-Cs(1)-O(1)#1</b>  | 123.86(14) | <b>O(9)-Cs(1)-O(2)#3</b> | 98.17(15)  |
| <b>O(5)#4-Cs(1)-O(2)#2</b>  | 119.97(12) | <b>O(9)-Cs(1)-O(2)#2</b> | 65.81(14)  |
| <b>O(5)#4-Cs(1)-O(2)#3</b>  | 79.03(12)  | <b>O(9)-Cs(1)-O(3)#4</b> | 132.23(15) |
| <b>O(5)#4-Cs(1)-O(3)#4</b>  | 41.91(13)  | <b>O(9)-Cs(1)-O(4)#5</b> | 105.25(15) |
| <b>O(5)#4-Cs(1)-O(4)#5</b>  | 74.36(13)  | <b>O(9)-Cs(1)-O(5)#4</b> | 174.04(15) |
| <b>O(5)#4-Cs(1)-O(6)#6</b>  | 104.98(12) | <b>O(9)-Cs(1)-O(6)#6</b> | 69.87(15)  |
| <b>O(5)#4-Cs(1)-O(7)#4</b>  | 39.02(12)  | <b>O(9)-Cs(1)-O(7)#4</b> | 146.75(14) |
| <b>O(5)#4-Cs(1)-O(8)#7</b>  | 88.12(14)  | <b>O(9)-Cs(1)-O(8)#8</b> | 82.76(15)  |
| <b>O(9)-Cs(1)-O(8)#7</b>    | 96.43(15)  | <b>O(6)-B(3)-O(5)</b>    | 123.4(7)   |
| <b>O(4)-B(2)-O(3)</b>       | 121.6(7)   | <b>O(6)-B(3)-O(7)</b>    | 122.7(7)   |
| <b>O(4)-B(2)-O(5)</b>       | 124.4(7)   | <b>O(7)-B(3)-O(5)</b>    | 113.9(6)   |
| <b>O(5)-B(2)-O(3)</b>       | 114.0(6)   | <b>O(8)-B(4)-O(7)</b>    | 122.6(7)   |
| <b>O(2)#15-B(5)-O(4)#15</b> | 112.2(6)   | <b>O(8)-B(4)-O(9)</b>    | 122.3(7)   |
| <b>O(2)#15-B(5)-O(6)</b>    | 108.4(7)   | <b>O(9)-B(4)-O(7)</b>    | 115.0(7)   |
| <b>O(4)#15-B(5)-O(6)</b>    | 105.9(6)   | <b>O(1)-B(1)-O(3)</b>    | 118.8(7)   |
| <b>O(8)-B(5)-O(2)#15</b>    | 110.3(6)   | <b>O(2)-B(1)-O(1)</b>    | 119.4(7)   |
| <b>O(8)-B(5)-O(4)#15</b>    | 108.2(6)   | <b>O(2)-B(1)-O(3)</b>    | 121.8(7)   |
| <b>O(8)-B(5)-O(6)</b>       | 111.8(6)   |                          |            |

Symmetry transformations used to generate equivalent atoms:

#1  $x-1, y-1, z$ ; #2  $-x+1, -y+1, -z+1$ ; #3  $x-1/2, -y+3/2, z+1/2$ ;

#4  $-x+1/2, y-1/2, -z+3/2$ ; #5  $x-1/2, -y+1/2, z+1/2$ ;

#6  $-x, -y+1, -z+1$ ; #7  $x+1/2, -y+1/2, z+1/2$ ; #8  $-x, -y, -z+1$ ;

#9  $-x+1/2, y+1/2, -z+1/2$ ; #10  $x+1, y+1, z$ ; #11  $x+1/2, -y+3/2, z-1/2$ ;

#12  $-x+1/2, y+1/2, -z+3/2$ ; #13  $x+1/2, -y+1/2, z-1/2$ ; #14  $x-1/2, -y+1/2, z-1/2$ ;

#15  $-x+1/2, y-1/2, -z+1/2$ ;

**Table S12.** The structural comparison of alkali and alkaline-earth metal hydroxyborates containing five boron atoms.

| NO. | Compounds                                                                                   | Space group (No.) | FBB                                       | Number            |           | Ref. |
|-----|---------------------------------------------------------------------------------------------|-------------------|-------------------------------------------|-------------------|-----------|------|
|     |                                                                                             |                   |                                           | of shared O atoms | Dimension |      |
| 1   | $\text{Li}_3(\text{B}_5\text{O}_8(\text{OH})_2)$                                            | $P4_12_12(92)$    | $\text{B}_5\text{O}_{10}(\text{OH})_2$    | 2                 | 2         | 1    |
| 2   | $\text{Li}_3(\text{B}_5\text{O}_8(\text{OH})_2)$                                            | $Pnc2(30)$        | $\text{B}_5\text{O}_{10}(\text{OH})_2$    | 2                 | 2         | 2    |
| 3   | $\text{Li}((\text{OH})_2\text{B}_5\text{O}_7)$                                              | $P2_1/c(14)$      | $\text{B}_5\text{O}_7(\text{OH})_2$       | 1                 | 1         | 3    |
| 4   | $\text{Li}(\text{B}_5\text{O}_6(\text{OH})_4)(\text{H}_2\text{O})_3$                        | $C2/c(15)$        | $\text{B}_5\text{O}_6(\text{OH})_4$       | 0                 | 0         | 4    |
| 5   | $\text{Li}_3(\text{B}_5\text{O}_8(\text{OH})_2)$                                            | $P4_32_2(96)$     | $\text{B}_5\text{O}_{10}(\text{OH})_2$    | 3                 | 3         | 5    |
| 6   | $(\text{Na}(\text{H}_2\text{O}))_2(\text{B}_5\text{O}_8(\text{OH}))$                        | $Pna2_1(33)$      | $\text{B}_5\text{O}_{10}(\text{OH})$      | 2                 | 2         | 6    |
| 7   | $\text{Na}(\text{B}_5\text{O}_6(\text{OH})_4)$                                              | $P2_1/c(14)$      | $\text{B}_5\text{O}_6(\text{OH})_4$       | 0                 | 0         | 7    |
| 8   | $\text{Na}(\text{B}_5\text{O}_6(\text{OH})_4)(\text{H}_2\text{O})_3$                        | $C2/c(15)$        | $\text{B}_5\text{O}_6(\text{OH})_4$       | 0                 | 0         | 8    |
| 9   | $\text{Na}(\text{B}_5\text{O}_7(\text{OH})_2)(\text{H}_2\text{O})$                          | $Pca2_1(29)$      | $\text{B}_5\text{O}_8(\text{OH})_2$       | 1                 | 1         | 9    |
| 10  | $\text{Na}(\text{B}_5\text{O}_8(\text{OH})_2)(\text{H}_2\text{O})_3$                        | $C2/c(15)$        | $\text{B}_5\text{O}_8(\text{OH})_2$       | 0                 | 0         | 10   |
| 11  | $\text{Na}_2\text{B}_5\text{O}_8(\text{OH})(\text{H}_2\text{O})_2$                          | $Pna2_1(33)$      | $\text{B}_5\text{O}_{10}(\text{OH})$      | 2                 | 2         | 11   |
| 12  | $\text{Na}_3(\text{B}_5\text{O}_8(\text{OH})_2)(\text{H}_2\text{O})$                        | $Pbca(61)$        | $\text{B}_5\text{O}_{10}(\text{OH})_2$    | 2                 | 2         | 12   |
| 13  | $\text{Na}_4(\text{B}_5\text{O}_7(\text{OH})_3)_2(\text{H}_2\text{O})_4$                    | $P\bar{1}(2)$     | $\text{B}_{10}\text{O}_{14}(\text{OH})_6$ | 0                 | 0         | 13   |
| 14  | $\text{K}(\text{B}_5\text{O}_6(\text{OH})_4)(\text{H}_2\text{O})_2$                         | $Aba2(41)$        | $\text{B}_5\text{O}_6(\text{OH})_4$       | 0                 | 0         | 14   |
| 15  | $\text{K}(\text{B}_5\text{O}_7(\text{OH})_2)$                                               | $P2_1/c(14)$      | $\text{B}_5\text{O}_8(\text{OH})_2$       | 1                 | 1         | 15   |
| 16  | $\text{K}(\text{B}_5\text{O}_7(\text{OH})_2)(\text{H}_2\text{O})$                           | $P2_1/c(14)$      | $\text{B}_5\text{O}_8(\text{OH})_2$       | 1                 | 1         | 16   |
| 17  | $\text{K}(\text{B}_5\text{O}_7(\text{OH})_2)(\text{H}_2\text{O})$                           | $P2_1/c(14)$      | $\text{B}_5\text{O}_8(\text{OH})_2$       | 1                 | 1         | 17   |
| 18  | $\text{K}_2(\text{B}_5\text{O}_8(\text{OH}))(\text{H}_2\text{O})_2$                         | $Pna2_1(33)$      | $\text{B}_5\text{O}_{10}(\text{OH})$      | 2                 | 2         | 18   |
| 19  | $\text{K}_3\text{B}_5\text{O}_8(\text{OH})_2$                                               | $Fdd2(43)$        | $\text{B}_5\text{O}_8(\text{OH})_2$       | 0                 | 0         | 19   |
| 20  | $\text{RbB}_5\text{O}_6(\text{OH})_4(\text{H}_2\text{O})_2$                                 | $Aba2(41)$        | $\text{B}_5\text{O}_6(\text{OH})_4$       | 0                 | 0         | 20   |
| 21  | $\text{RbB}_5\text{O}_7(\text{OH})_2(\text{H}_2\text{O})_{0.5}$                             | $P\bar{1}(2)$     | $\text{B}_5\text{O}_8(\text{OH})_2$       | 1                 | 1         | 21   |
| 22  | $\text{Cs}(\text{B}_5\text{O}_6(\text{OH})_4)(\text{H}_2\text{O})_2$                        | $P2_1/c(14)$      | $\text{B}_5\text{O}_6(\text{OH})_4$       | 0                 | 0         | 22   |
| 23  | $\text{Cs}(\text{B}_5\text{O}_6(\text{OH})_4)(\text{H}_2\text{O})_2$                        | $C2/c(15)$        | $\text{B}_5\text{O}_6(\text{OH})_4$       | 0                 | 0         | 23   |
| 24  | $\text{Ca}(\text{B}_5\text{O}_8(\text{OH}))(\text{B}(\text{OH})_3)(\text{H}_2\text{O})_3$   | $P2_1/c(14)$      | $\text{B}_5\text{O}_{10}(\text{OH})$      | 2                 | 2         | 24   |
| 25  | $\text{Ca}(\text{B}_5\text{O}_8(\text{OH}))(\text{H}_2\text{O})$                            | $P2_1/c(14)$      | $\text{B}_5\text{O}_{10}(\text{OH})$      | 2                 | 2         | 25   |
| 26  | $\text{Ca}_2(\text{B}_5\text{O}_7)(\text{OH})_5(\text{H}_2\text{O})$                        | $P2_1/c(14)$      | $\text{B}_5\text{O}_8(\text{OH})_5$       | 1                 | 1         | 26   |
| 27  | $\text{Ca}_2(\text{B}_5\text{O}_8(\text{OH}))_2(\text{B}(\text{OH})_3)(\text{H}_2\text{O})$ | $P1(1)$           | $\text{B}_{10}\text{O}_{20}(\text{OH})_2$ | 2                 | 2         | 27   |
| 28  | $\text{Ca}_2(\text{B}_5\text{O}_8(\text{OH}))_2(\text{B}(\text{OH})_3)(\text{H}_2\text{O})$ | $P2_1(4)$         | $\text{B}_{10}\text{O}_{20}(\text{OH})_2$ | 2                 | 2         | 28   |
| 29  | $\text{Ca}_2(\text{B}_5\text{O}_9)(\text{OH})(\text{H}_2\text{O})$                          | $Cc(9)$           | $\text{B}_5\text{O}_{11}(\text{OH})$      | 2                 | 2         | 29   |
| 30  | $\text{B}_5\text{Sr}_2\text{O}_9(\text{OH})$                                                | $P2_1/c(14)$      | $\text{B}_5\text{O}_{11}(\text{OH})$      | 2                 | 2         | 30   |
| 31  | $\text{Sr}(\text{B}_5\text{O}_8(\text{OH}))(\text{H}_2\text{O})$                            | $P\bar{1}(2)$     | $\text{B}_5\text{O}_{10}(\text{OH})$      | 2                 | 2         | 31   |
| 32  | $\text{Sr}_2(\text{B}_5\text{O}_8(\text{OH}))_2(\text{B}(\text{OH})_3)(\text{H}_2\text{O})$ | $Cc(9)$           | $\text{B}_5\text{O}_{10}(\text{OH})$      | 2                 | 2         | 32   |
| 33  | $\text{Sr}_2(\text{B}_5\text{O}_8(\text{OH}))_2\text{B}(\text{OH})_3(\text{H}_2\text{O})$   | $P2_1(4)$         | $\text{B}_{10}\text{O}_{20}(\text{OH})_2$ | 2                 | 2         | 33   |
| 34  | $\text{Ba}(\text{B}_5\text{O}_8(\text{OH}))(\text{H}_2\text{O})$                            | $P\bar{1}(2)$     | $\text{B}_5\text{O}_{10}(\text{OH})$      | 2                 | 2         | 34   |



|           |                                                                                             |              |                                           |   |   |              |
|-----------|---------------------------------------------------------------------------------------------|--------------|-------------------------------------------|---|---|--------------|
| <b>35</b> | $\text{Ba}_2(\text{B}_5\text{O}_8(\text{OH}))_2(\text{B}(\text{OH})_3)(\text{H}_2\text{O})$ | $P2_1(4)$    | $\text{B}_{10}\text{O}_{20}(\text{OH})_2$ | 2 | 2 | 35           |
| <b>36</b> | $\text{Ba}_2(\text{B}_5\text{O}_8(\text{OH})_2)(\text{OH})$                                 | $P2_1/c(14)$ | $\text{B}_5\text{O}_{10}(\text{OH})_2$    | 2 | 2 | 36           |
| <b>37</b> | $\text{Ba}_2\text{B}_5\text{O}_9(\text{OH})$                                                | $P2_1/c(14)$ | $\text{B}_5\text{O}_{11}(\text{OH})$      | 2 | 2 | 30           |
| <b>38</b> | $\text{K}_2\text{B}_5\text{O}_8(\text{OH})$                                                 | $Pca2_1(29)$ | $\text{B}_5\text{O}_{10}(\text{OH})$      | 2 | 2 | This<br>work |
| <b>39</b> | $\text{CsB}_5\text{O}_6(\text{OH})_4$                                                       | $P2_1/c(14)$ | $\text{B}_5\text{O}_6(\text{OH})_4$       | 0 | 0 | This<br>work |
| <b>40</b> | $\text{CsB}_5\text{O}_7(\text{OH})_2$                                                       | $P2_1/c(14)$ | $\text{B}_5\text{O}_8(\text{OH})_2$       | 1 | 1 | This<br>work |

**Table S13.** The calculated bonding electron density differences ( $\Delta\rho$ ) of different units in  $\text{K}_2\text{B}_5\text{O}_8(\text{OH})$ ,  $\text{CsB}_5\text{O}_6(\text{OH})_4$ , and  $\text{CsB}_5\text{O}_7(\text{OH})_2$ . Using the response electron distribution anisotropy (REDA) method.

|                                                               | units                    | $\Delta\rho$ | $\Delta\omega$ |
|---------------------------------------------------------------|--------------------------|--------------|----------------|
| <b><math>\text{K}_2\text{B}_5\text{O}_8(\text{OH})</math></b> | $\text{BO}_3$            | 0.008943     | 58.8 %         |
|                                                               | $\text{BO}_4$            | 0.001253     | 8.2 %          |
|                                                               | $\text{BO}_2(\text{OH})$ | 0.004197     | 27.6 %         |
|                                                               | $\text{KO}_9$            | 0.000638     | 4.2 %          |
|                                                               | $\text{KO}_8$            | 0.000171     | 1.1 %          |
| <b><math>\text{CsB}_5\text{O}_6(\text{OH})_4</math></b>       | $\text{BO}_2(\text{OH})$ | 0.016789     | 93.4 %         |
|                                                               | $\text{BO}_4$            | 0.000443     | 2.5 %          |
|                                                               | $\text{CsO}_{11}$        | 0.000747     | 4.2 %          |
| <b><math>\text{CsB}_5\text{O}_7(\text{OH})_2</math></b>       | $\text{BO}_3$            | 0.010603     | 47.5 %         |
|                                                               | $\text{BO}_2(\text{OH})$ | 0.010541     | 47.2 %         |
|                                                               | $\text{BO}_4$            | 0.000318     | 1.4 %          |
|                                                               | $\text{CsO}_9$           | 0.000866     | 3.9 %          |

**Table S14.** The number of hydroxyl groups in the unit cell, the density of hydroxyl groups, and the layer spacing between adjacent layers of  $\text{K}_2\text{B}_5\text{O}_8(\text{OH})$ ,  $\text{CsB}_5\text{O}_6(\text{OH})_4$ , and  $\text{CsB}_5\text{O}_7(\text{OH})_2$ .

| <b>Compounds</b>                            | <b>The number of hydroxyl groups in the unit cell</b> | <b>The density of hydroxyl groups (n/V) (<math>\text{\AA}^{-3}</math>)</b> | <b>The spacing between adjacent layers (<math>\text{\AA}</math>)</b> |
|---------------------------------------------|-------------------------------------------------------|----------------------------------------------------------------------------|----------------------------------------------------------------------|
| $\text{K}_2\text{B}_5\text{O}_8(\text{OH})$ | 4                                                     | 4.92                                                                       | 7.33                                                                 |
| $\text{CsB}_5\text{O}_6(\text{OH})_4$       | 16                                                    | 17.08                                                                      | 7.61                                                                 |
| $\text{CsB}_5\text{O}_7(\text{OH})_2$       | 8                                                     | 10.19                                                                      | 7.70                                                                 |

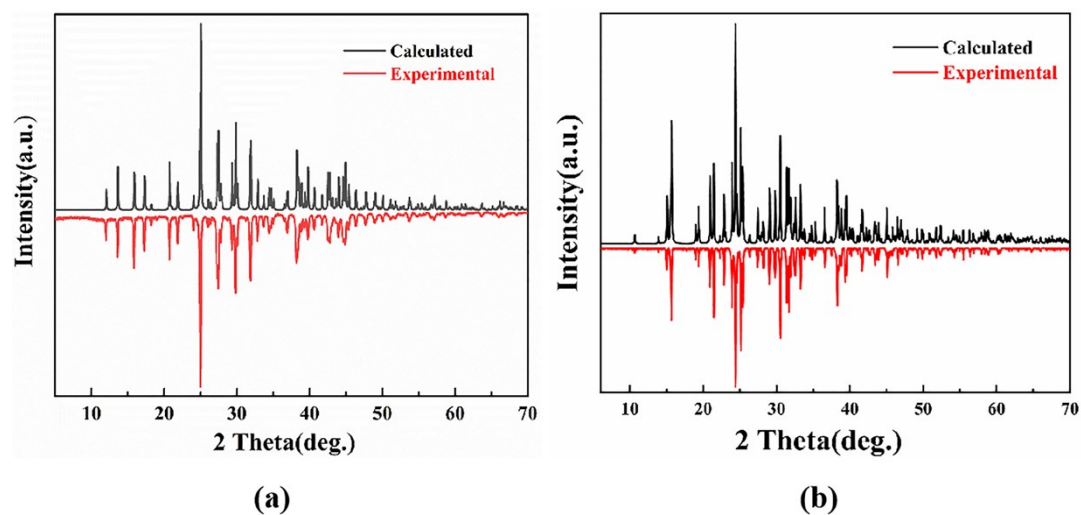

**Figure S1.** Experimental and calculated X-ray powder diffraction patterns of (a)  $K_2B_5O_8(OH)$  and (b)  $CsB_5O_7(OH)_2$ .

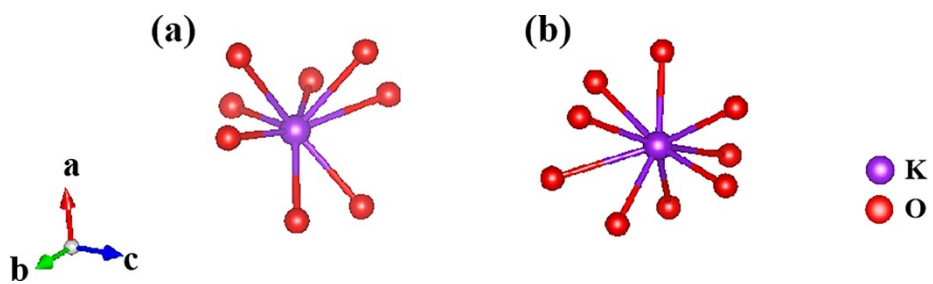

**Figure S2.** Coordination form of K in  $K_2B_5O_8(OH)$ : (a)  $[KO_8]$ , (b)  $[KO_9]$ .

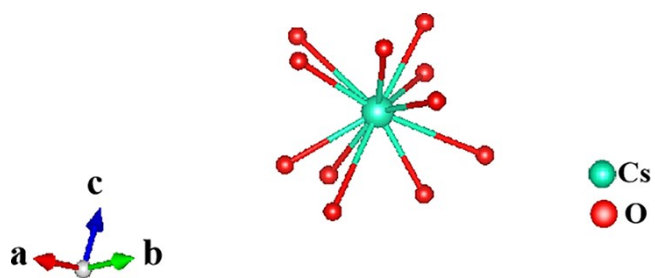

**Figure S3.** Coordination form of Cs in  $\text{CsB}_5\text{O}_6(\text{OH})_4$ :  $[\text{CsO}_{11}]$ .

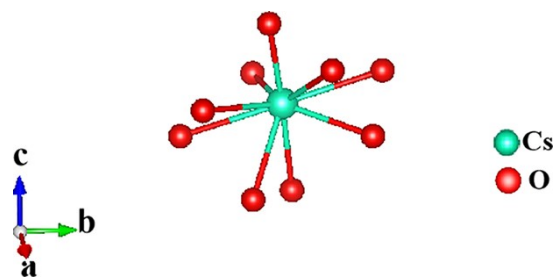

**Figure S4.** Coordination form of Cs in  $\text{CsB}_5\text{O}_7(\text{OH})_2$ :  $[\text{CsO}_9]$ .

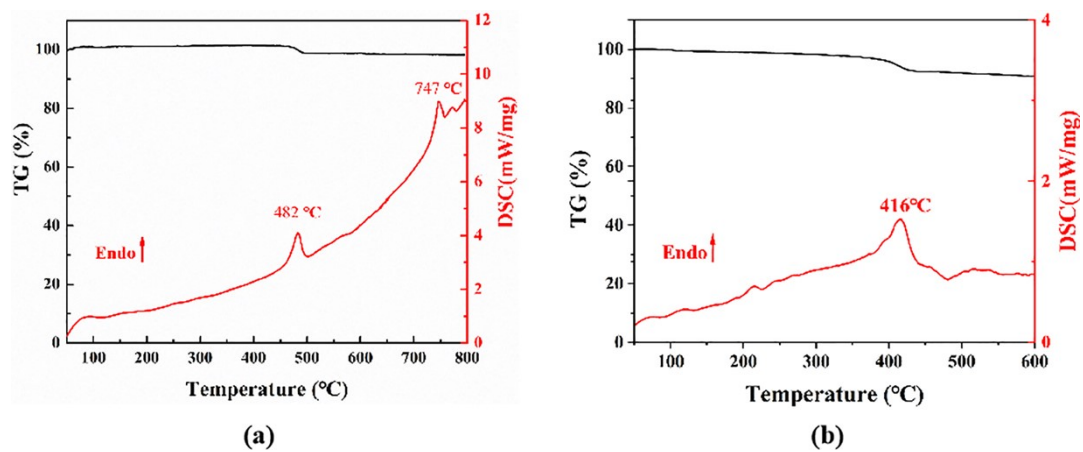

**Figure S5.** TG–DSC curves of (a)  $\text{K}_2\text{B}_5\text{O}_8(\text{OH})$  and (b)  $\text{CsB}_5\text{O}_7(\text{OH})_2$ .



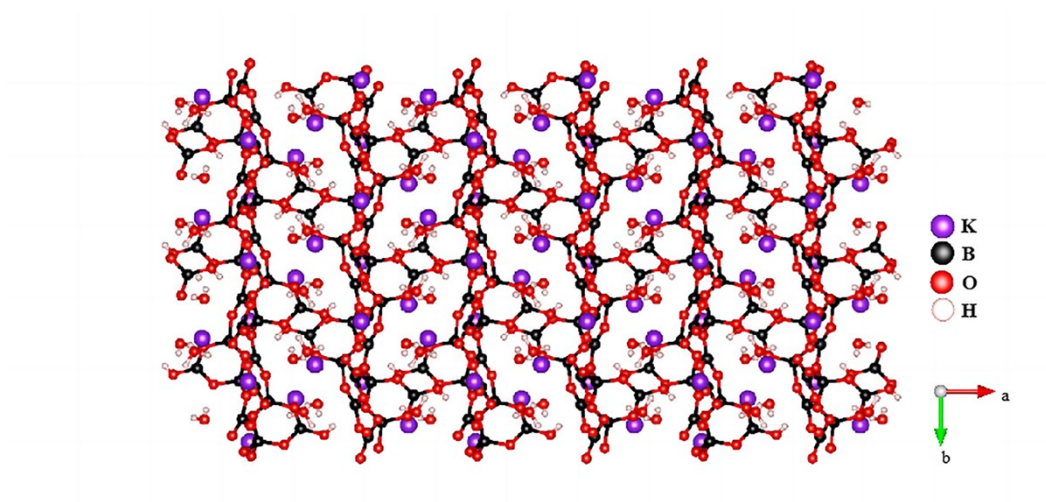

**Figure S6.** Crystal structure of  $K_2B_5O_8(OH) \cdot 2H_2O$ .

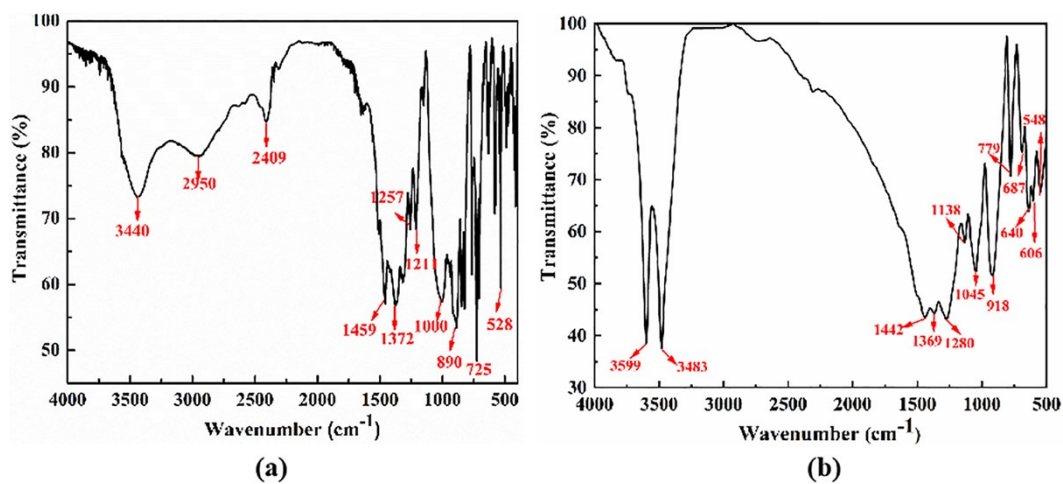

**Figure S7.** IR spectra of (a)  $\text{K}_2\text{B}_5\text{O}_8(\text{OH})$  and (b)  $\text{CsB}_5\text{O}_7(\text{OH})_2$ .

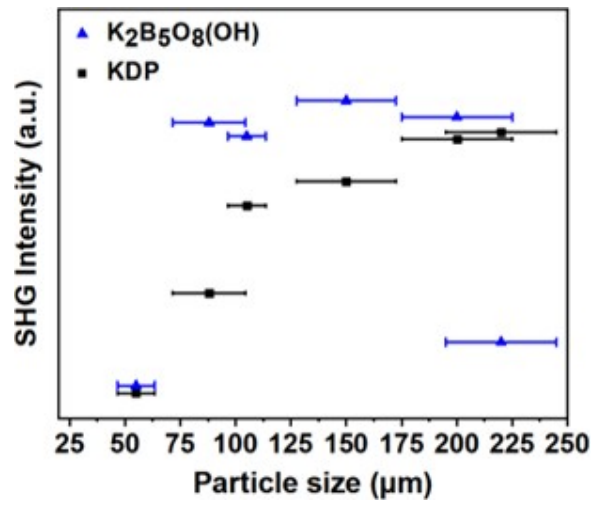

**Figure S8.** Phase-matching SHG signals for  $K_2B_5O_8(OH)$  and standard KDP with 1064 nm laser radiation.

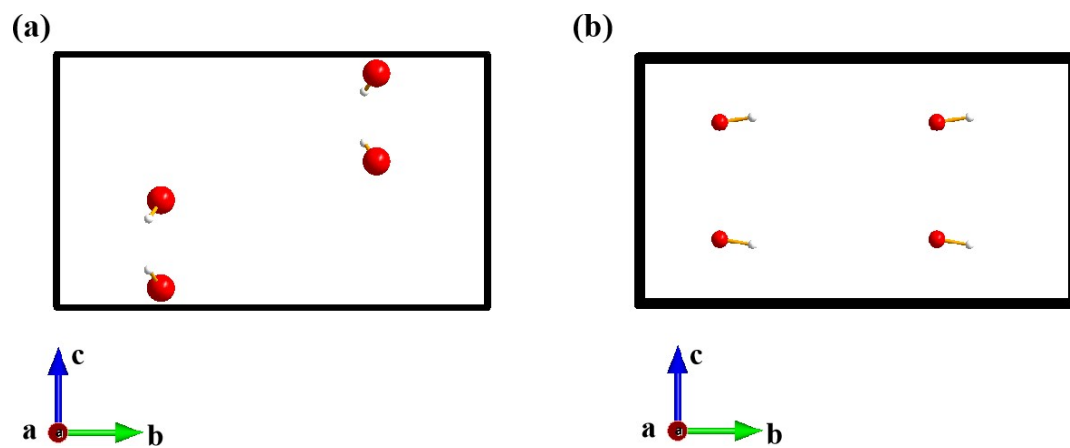

**Figure S9.** The arrangement of hydroxyl groups within the unit cell: (a)  $\text{Na}_2\text{B}_5\text{O}_8(\text{OH})\cdot 2\text{H}_2\text{O}$  and (b)  $\text{K}_2\text{B}_5\text{O}_8(\text{OH})$ .

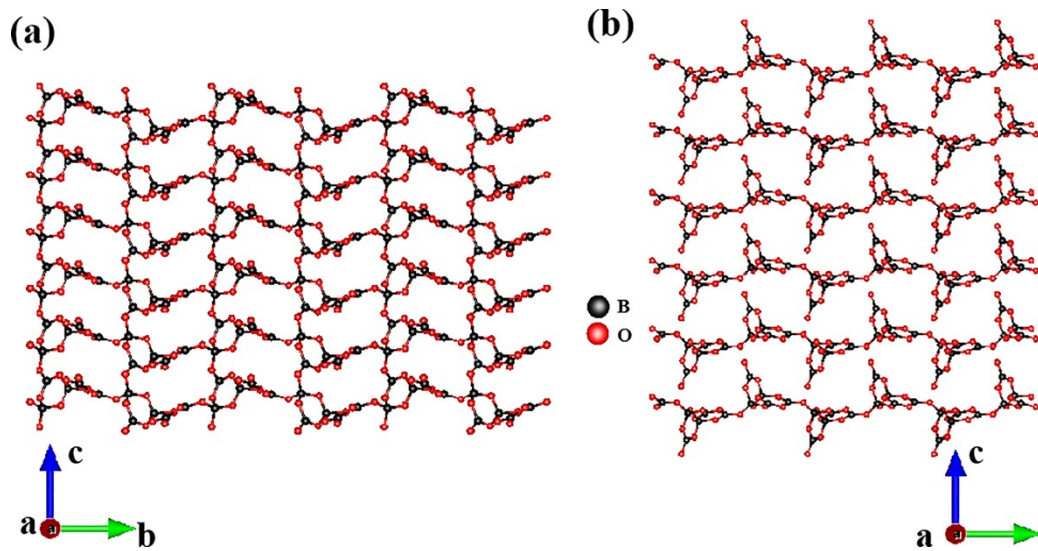

**Figure S10.** Arrangement of boron-oxygen groups in two-dimensional layered structures: (a)  $\text{K}_2\text{B}_5\text{O}_8(\text{OH})$  and (b)  $\text{Na}_2\text{B}_5\text{O}_8(\text{OH}) \cdot 2\text{H}_2\text{O}$ .

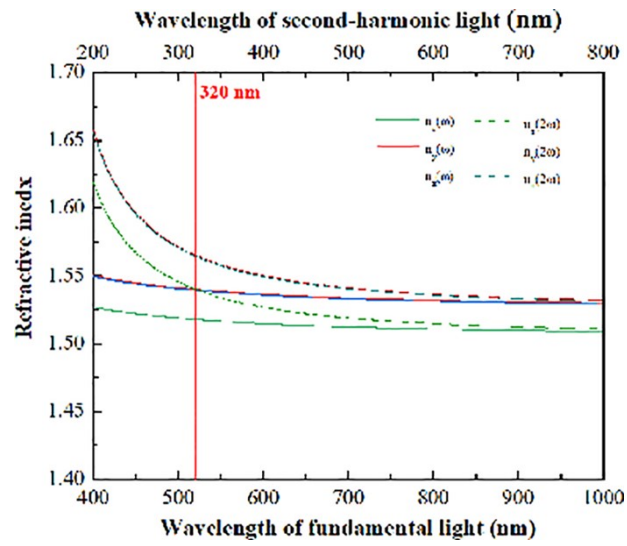

**Figure S11.** Predicted shortest SHG phase-matching wavelength for  $K_2B_5O_8(OH)$ .

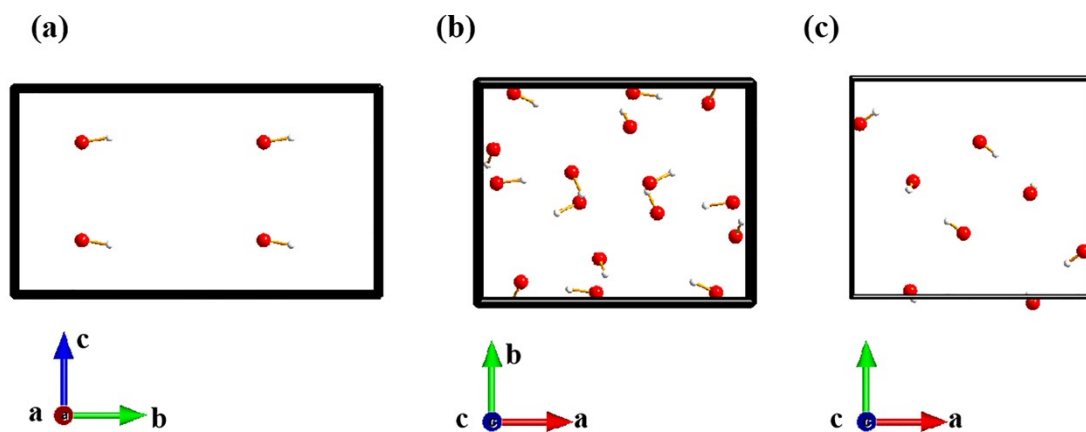

**Figure S12.** The number of hydroxyl groups in the unit cell of (a) $K_2B_5O_8(OH)$ , (b) $CsB_5O_6(OH)_4$ , and (c)  $CsB_5O_7(OH)_2$ .

## References

1. A. A. Sheviren, L. A. Muradyan, V. I. Simonov, Yu. K. Egorov Tismenko, M. A. Simonov and N. V. Belov, The Deformation Electronic Density in Lithium Borate  $\text{Li}_3\text{B}_5\text{O}_8(\text{OH})_2$ , *Dokl. Akad. Nauk SSSR*, 1981, **257**, 111-114.
2. E. V. Sokolova, N. A. Yamnova and N. V. Belov, Crystal Structure of Orthorhombic Li-Borate  $\text{Li}_3(\text{B}_5\text{O}_8(\text{OH})_2)$ , *Kristallogr.*, 1980, **25**, 716-721.
3. A. Cárdenas, J. Solans, K. Byrappa and K. V. K. Shekar, Structure of Lithium Catena-Poly[3,4-Dihydroxopentaborate-1:5- $\mu$ -oxo], *Acta Crystallogr., Sect. C: Cryst. Struct. Commun.*, 1993, **49**, 645-647.
4. M. Touboul, E. Bétourné and L. Seguin, Crystal Structure of  $\text{LiB}_5\text{O}_8 \cdot 5\text{H}_2\text{O}$ , *Mater. Sci. Forum*, 1996, **228-231**, 741-746.
5. P. Li and Z. H. Liu, Hydrothermal Synthesis, Characterization, and Thermodynamic Properties of a New Lithium Borate,  $\text{Li}_3\text{B}_5\text{O}_8(\text{OH})_2$ , *J. Chem. Eng. Data*, 2010, **55**, 2682-2686.
6. E. Corazza, S. Menchetti and C. Sabelli, The Crystal Structure of Nasinite,  $\text{Na}_2[\text{B}_5\text{O}_8(\text{OH})] \cdot 2\text{H}_2\text{O}$ , *Acta Crystallogr., Sect. B*, 1975, **31**, 2405-2410.
7. S. Menchetti and C. Sabelli, The Crystal Structure of  $\text{NaB}_5\text{O}_6(\text{OH})_4$ , *Acta Crystallogr., Sect. B*, 1978, **34**, 45-49.
8. U. Timper, G. Heller and M. Shakibaie-Moghadam, Sborgit und  $\beta$ -Sborgit — Eine Zweite Synthetische Modifikation von  $\text{Na}[\text{B}_5\text{O}_6(\text{OH})_4] \cdot 3 \text{H}_2\text{O}$  / Sborgit and  $\beta$ -Sborgit – a Second Synthetic Modification of  $\text{Na}[\text{B}_5\text{O}_6(\text{OH})_4] \cdot 3 \text{H}_2\text{O}$ , *Z. Naturforsch., B*, 1990, **45**, 1155-1166.
9. C. Wu, L. H. Li, J. L. Song, G. Yang, M. G. Humphrey and C. Zhang, Facile Syntheses of  $\text{Ba}_2[\text{B}_4\text{O}_7(\text{OH})_2]$  and  $\text{Na}[\text{B}_5\text{O}_7(\text{OH})_2](\text{H}_2\text{O})$  Borate Salts Exhibiting Nonlinear Optical Activity in the Ultraviolet, *Inorg. Chem.*, 2017, **56**, 1340-1348.
10. Y. J. Wang, A. Q. Jia, X. S. Chen, H. T. Shi and Q. F. Zhang, Syntheses and Crystal Structures of Two New Sodium Borates  $[\text{Na}_2(\text{H}_2\text{O})_3][\text{B}_5\text{O}_8(\text{OH})_2]$  and  $\text{Na}[\text{enH}_2][\text{B}_7\text{O}_{10}(\text{OH})_4]$ , *Z. Naturforsch., B*, 2016, **71**, 15-21.
11. Y. J. Wang, S. L. Pan, X. L. Tian, Z. X. Zhou, G. Liu, J. Wang and D. Z. Jia, Synthesis, Structure, and Properties of the Noncentrosymmetric Hydrated Borate  $\text{Na}_2\text{B}_5\text{O}_8(\text{OH}) \cdot 2\text{H}_2\text{O}$ , *Inorg. Chem.*, 2009, **48**, 7800-7804.
12. S. Menchetti and C. Sabelli, The Crystal Structure of Synthetic Sodium Pentaborate Monohydrate, *Acta Crystallogr., Sect. B*, 1977, **33**, 3730-3733.
13. E. Cannillo, A. Dal Negro and L. Ungaretti, The Crystal Structure of Ezcurrite, *Am. Mineral.*, 1973, **58**, 110-115.
14. J. P. Ashmore and H. E. Petch, Hydrogen Positions in Potassium Pentaborate Tetrahydrate as Determined by Neutron Diffraction, *Can. J. Phys.*, 1970, **48**, 1091-1097.
15. Q. Wu, Potassium Pentaborate, *Acta Crystallogr. Sect. E: Struct. Rep. Online*, 2011, **67**, i67-i67.
16. H. X. Zhang, J. Zhang, S. T. Zheng and G. Y. Yang, Two New Potassium Borates,  $\text{K}_4\text{B}_{10}\text{O}_{15}(\text{OH})_4$  with Stepped Chain and  $\text{KB}_5\text{O}_7(\text{OH})_2 \cdot \text{H}_2\text{O}$  with Double Helical Chain, *Cryst. Growth Des.*, 2004, **5**, 157-161.
17. I. V. Pekov, N. V. Zubkova, O. V. Korotchenkova, I. I. Chaikovskiy, V. O. Yapaskurt, N. V. Chukanov, D. I. Belakovskiy, I. S. Lykova, S. N. Britvin and D. Y. Yarzhemskiite.



- Pushcharovsky,  $K[B_5O_7(OH)_2] \cdot H_2O$ , a New Mineral from the Chelkar Salt Dome, *Western Kazakhstan. Mineral. Mag.*, 2020, **84**, 335-342.
18. Y. T. Shi, M. Luo, C. S. Lin, G. Peng and N. Ye, Two Deep Ultraviolet Hydrated Borate Crystals: Centrosymmetric  $LiRbB_5O_8(OH) \cdot H_2O$  and Non-Centrosymmetric  $K_2B_5O_8(OH) \cdot 2H_2O$ , *Cryst. Growth Des.*, 2019, **19**, 3052-3059.
  19. F. H. Ding, M. L. Nisbet, W. G. Zhang, P. S. Halasyamani, L. Y. Chai and K. R. Poeppelmeier, Why Some Noncentrosymmetric Borates Do Not Make Good Nonlinear Optical Materials: A Case Study with  $K_3B_5O_8(OH)_2$ , *Inorg. Chem.*, 2018, **57**, 11801-11808.
  20. H. Behm, Rubidium Pentaborate Tetrahydrate,  $Rb[B_5O_6(OH)_4] \cdot 2H_2O$ , *Acta Crystallogr., Sect. C: Cryst. Struct. Commun.*, 1984, **40**, 217-220.
  21. E. L. Belokoneva, T. A. Borisova and O. V. Dimitrova, New Rubidium Pentaborate  $Rb(B_5O_7(OH)_2) \cdot 0.5(H_2O)$  with a 5:(4 $\Delta$ +1T) Anionic Block and its Relation to Larderellite  $(NH_4)(B_5O_7(OH)_2) \cdot (H_2O)$  on the Basis of the OD Theory, *Kristallogr.*, 2003, **48**, 634-641.
  22. H. Behm, Structure Determination on a Twinned Crystal of Cesium Pentaborate Tetrahydrate,  $Cs(B_5O_6(OH)_4)(H_2O)_2$ , *Acta Crystallogr., Sect. C: Cryst. Struct. Commun.*, 1984, **40**, 1114-1116.
  23. N. Penin, L. Seguin, B. Gérard, M. Touboul and G. Nowogrocki, Crystal Structure of a New form of  $Cs[B_5O_6(OH)_4] \cdot 2H_2O$  and Thermal Behavior of  $M[B_5O_6(OH)_4] \cdot 2H_2O$  (M=Cs, Rb, Tl), *J. Alloys Compd.*, 2002, **334**, 97-109.
  24. J. A. Konnert, J. R. Clark and C. L. G. Christ,  $CaB_5O_8(OH)B(OH)_3(H_2O)_3$ : Crystal Structure and Comparison with Related Borates, *Am. Mineral.*, 1972, **57**, 381-396.
  25. N. A. Yamnova, Y. K. E. Tismenko, N. V. Zubkova, O. V. Dimitrova, A. P. Kantor, Danian and Y. Ming X. Crystal Structure of New Synthetic Calcium Pentaborate  $Ca(B_5O_8(OH))H_2O$  and its Relation to Pentaborates with Similar Boron-Oxygen Radicals, *Kristallogr.*, 2003, **48**, 608-613.
  26. K. S. Wallwork, Pring A., M. R. Taylor and B. A. Hunter, The Structure of Priceite, a Basic Hydrated Calcium Borate, by ab Initio Powder-diffraction Methods, *Can. Mineral*, 2002, **40**, 1199-1206.
  27. Q. M. Qiu, X. Y. Li, C. A. Chen, K. N. Sun and G. Y. Yang, Polar Polymorphism:  $\beta$ - $Ca_2[B_5O_8(OH)]_2[B(OH)_3] \cdot H_2O$ . Synthesis, Structure and Nonlinear Optical Property, *Solid State Chem*, 2021, **299**, 122193.
  28. Q. Wei, L. Sun, J. Zhang and G. Y. Yang, Two Deep-ultraviolet Nonlinear Optical Alkaline-Earth Metal Borates Based on Different Types of Oxoboron Clusters, *Dalton Trans.*, 2017, **46**, 7911-7916.
  29. Q. Wei, J. W. Cheng, C. He and G. Y. Yang, An Acentric Calcium Borate  $Ca_2[B_5O_9](OH)H_2O$ : Synthesis, Structure, and Nonlinear Optical Property, *Inorg. Chem.*, 2014, **53**, 11757-11763.
  30. C. McMillen, C. Heyward, H. Giesber and J. Kolis, Crystal Structures of the Novel Hydrated Borates  $Ba_2B_5O_9(OH)$ ,  $Sr_2B_5O_9(OH)$  and  $Li_2Sr_8B_{22}O_{41}(OH)_2$ , *Solid State Chem.*, 2011, **184**, 2966-2971.
  31. G. Huang, R. Pan, H. He, B. F. Yang and G. Y. Yang, Two New Borates Made of  $[B_5O_6(OH)_4]^-$  and  $[B_5O_{10}(OH)]^{6-}$  Clusters, Accompanying a Novel in Situ Organic Reaction, *Cluster Sci.*, 2015, **26**, 2023-2032.
  32. J. R. Clark and C. L. Christ, Veatchite: Crystal Structure and Correlations with Pveatchite, *Am. Mineral.*, 1971, **56**, 1934-1954.

33. I. M. Rumanova and O. Gandymov, The Crystal Structure of the Natural Strontium Borate, P-Veatchite,  $\text{Sr}_2(\text{B}_5\text{O}_8(\text{OH})_2)\text{B}(\text{OH})_3\text{H}_2\text{O}$ , *Kristallogr.*, 1971, **16**, 99-106.
34. D. Y. Pushcharovskii, S. Merlino, O. Ferro, S. A. Vinogradova and O. V. Dimitrova, The Crystal Structures of Two New Ba Borates: Pentaborate Hydrate,  $\text{Ba}(\text{B}_5\text{O}_8(\text{OH}))\cdot(\text{H}_2\text{O})$ , and Decaborate,  $\text{LiBa}_2(\text{B}_{10}\text{O}_{16}(\text{OH})_3)$ . *J. Alloys Compd.*, 2000, **306**, 163-169.
35. H. Q. Wu and Y. Y. Li, A New Acentric Borate of  $\text{Ba}_2[\text{B}_5\text{O}_8(\text{OH})]_2[\text{B}(\text{OH})_3]\cdot\text{H}_2\text{O}$ . Synthesis, Structure and Nonlinear Optical Property, *Inorg. Chem. Commun.*, 2020, **121**, 108220.
36. E. L. Belokoneva, O. V. Dimitrova and S. Y. Stefanovich, Structures and Properties of Layered Barium Borates  $\text{Ba}_{0.975}[\text{B}_6\text{O}_9(\text{OH})(\text{O}_{0.975}\text{Br}_{0.025})\cdot\text{B}_2\text{O}(\text{OH})_3]$ ,  $\text{Ba}_2[\text{B}_5\text{O}_8(\text{OH})_2](\text{OH})$ ,  $\text{Na}_2\text{Ba}_2[\text{B}_{20}\text{O}_{34}(\text{OH})_4]$ , and  $\text{Ba}_5[\text{B}_{20}\text{O}_{33}(\text{OH})_4]\text{H}_2\text{O}$ , *Crystallogr. Rep.*, 2012, **57**, 64-72.
